# Supplementary material for: Gold nanoparticles enhanced chemiluminescence – a novel approach for sensitive determination of aflatoxin-B1
Source: Royal Society of Chemistry journal article supplement (doi:10.1039/c3ay40694f), 2013-01-01
Supplement: c3ay40694f.pdf [file c3ay40694f.pdf]

**Supplementary material** of paper entitled: **Gold nanoparticles enhanced chemiluminescence - A novel approach for sensitive determination of aflatoxin-B1** authored by Abhijith K.S, Ragavan K.V and Thakur M.S. \*submitted to your esteemed journal Analytical methods.

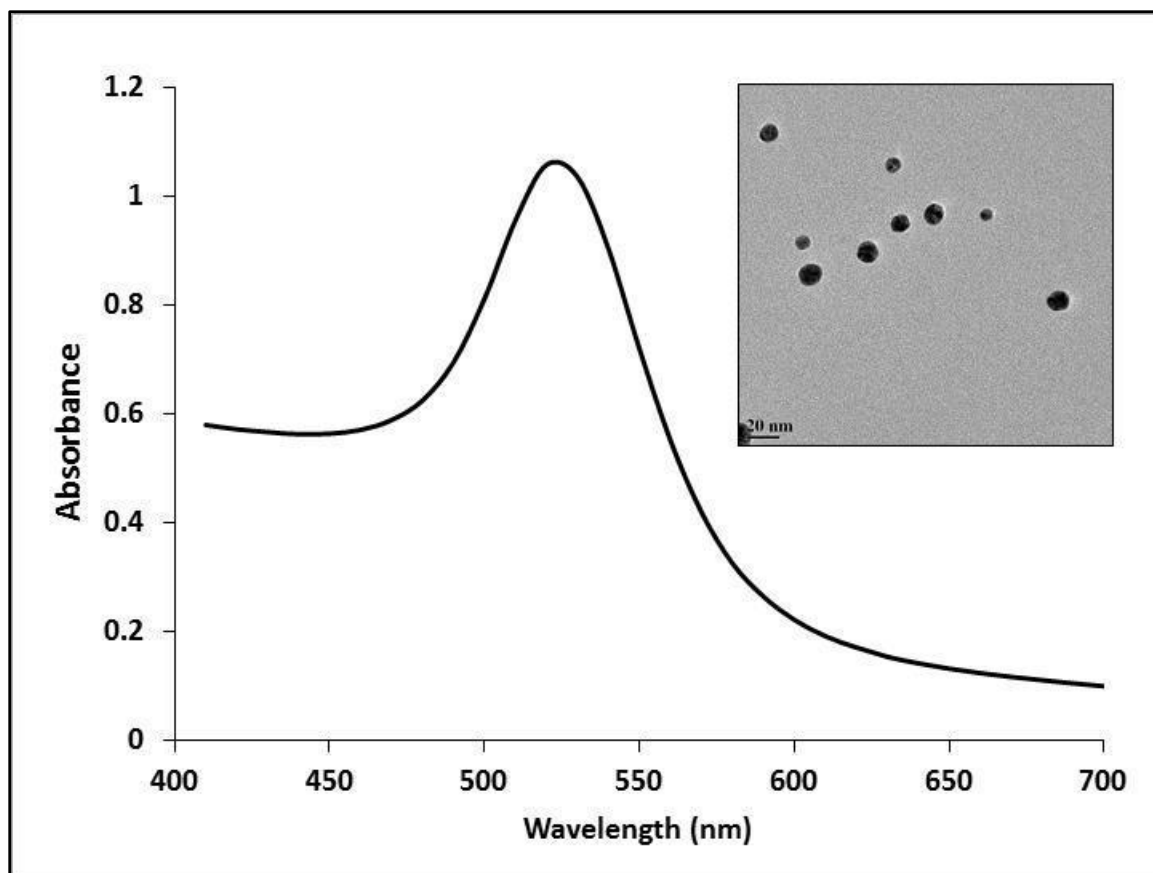

**Supplementary Figure 1: Absorbance spectra of spherical gold nanoparticles (inset image showing TEM picture of the same).**

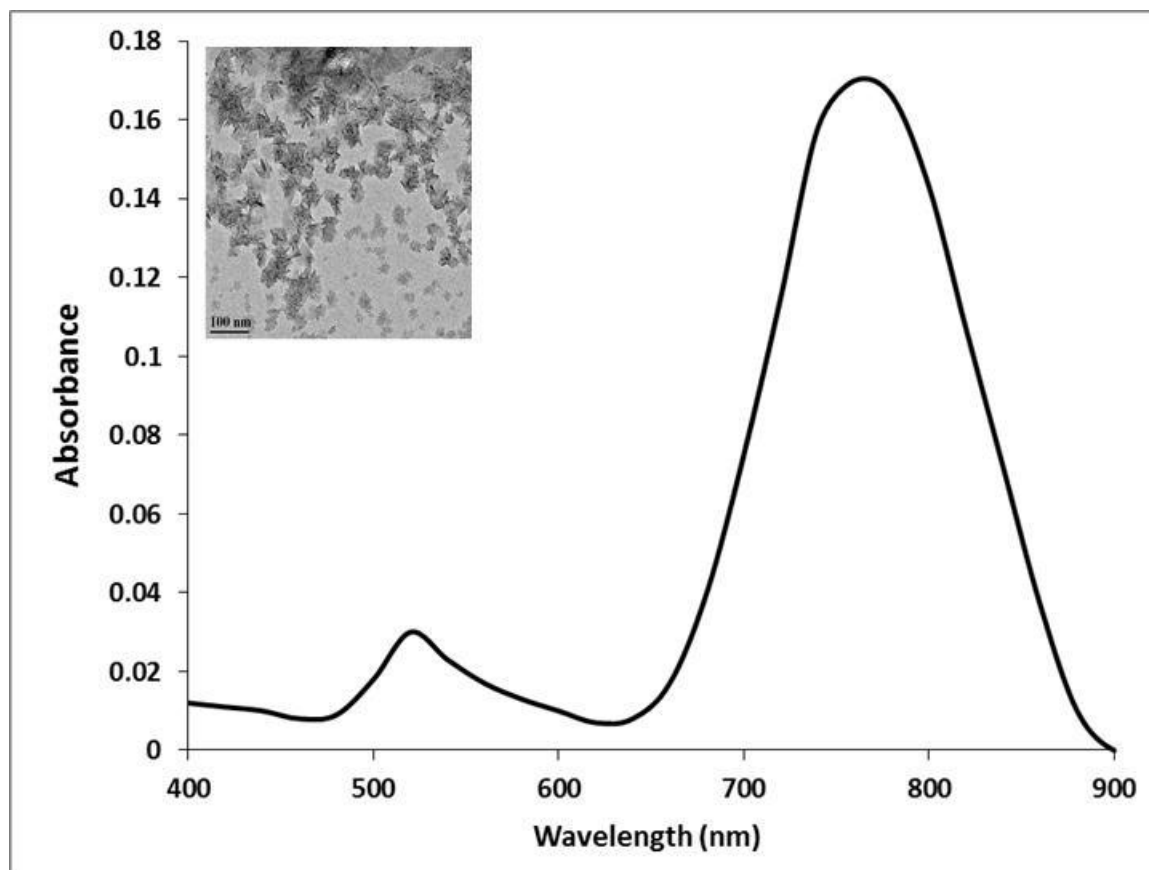

Supplementary Figure 2: Absorption spectra of Gold nanorods (SEM image in the inset).
